# Supplementary material
Source: publisher figshare collection journal article supplement (https://diabetesjournals.figshare.com/ndownloader/files/36490455)

**Supplementary Table S1: study inclusion and exclusion criteria**

|                           | <b>DIASTOLIC</b>                                                                                                                                                                                                                                                                                                                                                                                                                                                                                                                                                                                                                                                                                                                                                                                                                                                                                                                                                                                            | <b>LYDIA</b>                                                                                                                                                                                                                                                                                                                                                                                                                                                                                              | <b>SEESAW</b>                                                                                                                                                                                                                                                                                                                                                                                                                                                                                                                                                                                                                                |
|---------------------------|-------------------------------------------------------------------------------------------------------------------------------------------------------------------------------------------------------------------------------------------------------------------------------------------------------------------------------------------------------------------------------------------------------------------------------------------------------------------------------------------------------------------------------------------------------------------------------------------------------------------------------------------------------------------------------------------------------------------------------------------------------------------------------------------------------------------------------------------------------------------------------------------------------------------------------------------------------------------------------------------------------------|-----------------------------------------------------------------------------------------------------------------------------------------------------------------------------------------------------------------------------------------------------------------------------------------------------------------------------------------------------------------------------------------------------------------------------------------------------------------------------------------------------------|----------------------------------------------------------------------------------------------------------------------------------------------------------------------------------------------------------------------------------------------------------------------------------------------------------------------------------------------------------------------------------------------------------------------------------------------------------------------------------------------------------------------------------------------------------------------------------------------------------------------------------------------|
| <i>Inclusion criteria</i> | <p>Capacity to provide informed consent before any trial-related activities.</p> <p>Age <math>\geq 18</math> and <math>\leq 65</math> years</p> <p>Diagnosis of type 2 diabetes (T2D) before the age of 60 years of age.</p> <p>Established T2D (<math>\geq 3</math> months).</p> <p>Body mass index (BMI) <math>&gt; 30 \text{ kg/m}^2</math> (<math>27 \text{ kg/m}^2</math> if South Asian or other black and minority ethnic (BME) populations).</p> <p>HbA1c <math>\leq 9\%</math> if on triple therapy or <math>\leq 10\%</math> on diet and exercise or monotherapy or dual therapy.</p> <p>Current glucose-lowering therapy either mono, dual or triple of any combination of metformin, sulphonylurea, DPP-IV inhibitor, GLP-1 therapy or an SGLT2i <math>\pm</math> diet and exercise.</p> <p>Poorly managed diet controlled diabetes (with HbA1c <math>&gt; 6.5\%</math>, not currently taking any glucose-lowering therapy, meeting BMI inclusion range).</p> <p>Able to understand English</p> | <p>Capacity to provide informed consent before any trial-related activities</p> <p>Individuals aged 18 - 60 years inclusive<br/>Established T2DM</p> <p>BMI <math>\geq 30 \text{ kg/m}^2</math> (<math>\geq 27 \text{ kg/m}^2</math> for South Asians or other BME populations)</p> <p>An HbA1c value of greater than or equal to 6.5% and less than 10%</p> <p>On mono or combination oral therapy (sulphonylurea and/or metformin) for <math>\geq 3</math> months</p> <p>Able to understand English</p> | <p>Capacity to provide informed consent before any trial-related activities.</p> <p>Male and postmenopausal female participants aged between 30-75 years of age inclusive</p> <p>Type 2 diabetes on diet and lifestyle control or stable dose of metformin only for at least 3 months</p> <p>Stable weight (less than 5% change in body weight in last 3 months)</p> <p>HbA1c 48-86mmol/mol (6.0 - 10%)</p> <p>Estimated glomerular filtration rate (eGFR) <math>\geq 60 \text{ ml/min/1.73m}^2</math></p> <p>BMI <math>\geq 25 \text{ kg/m}^2</math></p> <p>Able and willing to give informed consent</p> <p>Able to understand English</p> |

|                           |                                                                                                                                                                                                                                                                                                                                                                                                                                                                                                                                                                                                                                                                                                                                                                                                                                                    |                                                                                                                                                                                                                                                                                                                                                                                                                                                                                                                                                                                                                                                                                                                                                                                                                                |                                                                                                                                                                                                                                                                                                                                                                                                                                                                                                                                                                                                                                                                                                                                               |
|---------------------------|----------------------------------------------------------------------------------------------------------------------------------------------------------------------------------------------------------------------------------------------------------------------------------------------------------------------------------------------------------------------------------------------------------------------------------------------------------------------------------------------------------------------------------------------------------------------------------------------------------------------------------------------------------------------------------------------------------------------------------------------------------------------------------------------------------------------------------------------------|--------------------------------------------------------------------------------------------------------------------------------------------------------------------------------------------------------------------------------------------------------------------------------------------------------------------------------------------------------------------------------------------------------------------------------------------------------------------------------------------------------------------------------------------------------------------------------------------------------------------------------------------------------------------------------------------------------------------------------------------------------------------------------------------------------------------------------|-----------------------------------------------------------------------------------------------------------------------------------------------------------------------------------------------------------------------------------------------------------------------------------------------------------------------------------------------------------------------------------------------------------------------------------------------------------------------------------------------------------------------------------------------------------------------------------------------------------------------------------------------------------------------------------------------------------------------------------------------|
|                           |                                                                                                                                                                                                                                                                                                                                                                                                                                                                                                                                                                                                                                                                                                                                                                                                                                                    |                                                                                                                                                                                                                                                                                                                                                                                                                                                                                                                                                                                                                                                                                                                                                                                                                                |                                                                                                                                                                                                                                                                                                                                                                                                                                                                                                                                                                                                                                                                                                                                               |
| <i>Exclusion criteria</i> | <p>Diabetes duration &gt;12 years.</p> <p>Currently taking more than three glucose-lowering therapies.</p> <p>Weight loss of &gt;5 kg in the preceding 6 months.</p> <p>eGFR &lt;30 mL/min/1.73 m<sup>2</sup>.</p> <p>Current therapy with insulin, thiazolidinediones, steroids or atypical antipsychotic medication.</p> <p>Untreated thyroid disease.</p> <p>Known macrovascular disease including coronary artery disease, stroke/ transient ischaemic attack (TIA) or peripheral vascular disease.</p> <p>Presence of arrhythmia (including atrial fibrillation, atrial flutter or second or third degree atrioventricular block).</p> <p>Known heart failure or other clinically relevant heart disease.</p> <p>Inability to exercise or undertake a MRP.</p> <p>Absolute contraindication to cardiac magnetic resonance imaging (CMRI).</p> | <p>Type 1 diabetes (identified through C-peptide analysis)</p> <p>Women who are pregnant, breast-feeding or intend to become pregnant or are not using adequate contraceptive methods</p> <p>Suffer from terminal illness</p> <p>eGFR &lt; 30 ml/min/1.73m<sup>2</sup></p> <p>Impaired liver function (Alanine aminotransferase (ALT) ≥2.5 times upper limit of normal)</p> <p>Known to be Hepatitis B antigen or Hepatitis C antibody positive</p> <p>Clinically significant active cardiovascular disease including history of myocardial infarction within the past 6 months and/or heart failure (New York Heart Association (NYHA) class III and IV) at the discretion of the investigator</p> <p>Recurrent major hypoglycaemia as judged by the investigator</p> <p>Known or suspected allergy to the trial products</p> | <p>Patients with Type 1 diabetes</p> <p>Patients on loop diuretics</p> <p>eGFR &lt;60ml/min/1.73m<sup>2</sup></p> <p>HbA1c &gt;86mmol/mol (10%) or recent hospital admission with diabetic emergency in last 3 months</p> <p>Patients with familial renal glycosuria</p> <p>Patients with recurrent balanitis, vaginal or urinary tract infections</p> <p>Shift workers</p> <p>Patients who have participated in another study of an investigational medicinal product in the last 3 months</p> <p>Active malignancy</p> <p>Serious illness with a life-expectancy of less than 1 year</p> <p>Hypersensitivity to Empagliflozin (Jardiance™) or to any of the excipients</p> <p>Patients with latent autoimmune diabetes in adults (LADA)</p> |

|  |                                                                                                                                                                                                 |                                                                                                                                                                                                                                                                                                                                                                                                                                                                                                                                                               |                                                                                                                                                                                                                                                                                                    |
|--|-------------------------------------------------------------------------------------------------------------------------------------------------------------------------------------------------|---------------------------------------------------------------------------------------------------------------------------------------------------------------------------------------------------------------------------------------------------------------------------------------------------------------------------------------------------------------------------------------------------------------------------------------------------------------------------------------------------------------------------------------------------------------|----------------------------------------------------------------------------------------------------------------------------------------------------------------------------------------------------------------------------------------------------------------------------------------------------|
|  | <p>Cardiovascular symptoms (angina and limiting dyspnoea during normal physical activity).</p> <p>Inflammatory condition, for example, connective tissue disorder and rheumatoid arthritis.</p> | <p>Known or suspected thyroid disease</p> <p>Receipt of any investigational drug within four weeks prior to this trial</p> <p>Have severe and enduring mental health problems</p> <p>Are not primarily responsible for their own care</p> <p>Receiving insulin therapy</p> <p>Have taken a thiazolidinedione (TZD) within the last 3 months</p> <p>Absolute contraindications to MRI</p> <p>Any contraindication to Sitagliptin or Liraglutide</p> <p>Have severe irritable bowel disorder</p> <p>Have pancreatitis or a previous history of pancreatitis</p> | <p>Patients with a history of chronic pancreatitis</p> <p>Evidence of conditions that lead to restricted food intake or severe dehydration</p> <p>Patients with a history of excessive alcohol consumption</p> <p>Patients on a severely calorie restricted diet (i.e., ≤800 calories per day)</p> |
|--|-------------------------------------------------------------------------------------------------------------------------------------------------------------------------------------------------|---------------------------------------------------------------------------------------------------------------------------------------------------------------------------------------------------------------------------------------------------------------------------------------------------------------------------------------------------------------------------------------------------------------------------------------------------------------------------------------------------------------------------------------------------------------|----------------------------------------------------------------------------------------------------------------------------------------------------------------------------------------------------------------------------------------------------------------------------------------------------|

**Supplementary Table S2: Study characteristics stratified by study**

| <b>Characteristic</b>                             | <b>DIASTOLIC (control and meal replacement plan groups, n = 49)</b> | <b>LYDIA (liraglutide and sitagliptin groups, n = 41)</b> | <b>SEESAW (placebo, diet, empaglifozin, empaglifozin plus diet groups, n = 58)</b> |
|---------------------------------------------------|---------------------------------------------------------------------|-----------------------------------------------------------|------------------------------------------------------------------------------------|
| Age (years)                                       | 51 (47, 55)                                                         | 47 (39, 49)                                               | 65 (58, 69)                                                                        |
| Sex                                               |                                                                     |                                                           |                                                                                    |
| Women (%)                                         | 20 (41)                                                             | 20 (49)                                                   | 21 (36)                                                                            |
| Men (%)                                           | 29 (59)                                                             | 21 (51)                                                   | 36 (64)                                                                            |
| Ethnicity                                         |                                                                     |                                                           |                                                                                    |
| White (%)                                         | 32 (65)                                                             | 26 (66)                                                   | 43 (74)                                                                            |
| South Asian (%)                                   | 12 (25)                                                             | 15 (34)                                                   | 9 (16)                                                                             |
| Other (%)                                         | 5 (10)                                                              | 0 (0)                                                     | 6 (10)                                                                             |
| Medications                                       |                                                                     |                                                           |                                                                                    |
| Metformin (%)                                     | 46 (94)                                                             | 40 (98)                                                   | 47 (81)                                                                            |
| Sulphonylureas (%)                                | 6 (12)                                                              | 10 (25)                                                   | 0 (0)                                                                              |
| Other (%)                                         | 6 (12)                                                              | 0 (0)                                                     | 0 (0)                                                                              |
| Diabetes duration (years)                         | 4.5 (2.3, 5.6)                                                      | 3.0 (1.0, 6.5)                                            | 7.0 (4.0, 10.0)                                                                    |
| BMI (kg/m <sup>2</sup> )                          | 35.0 (33.0, 38.1)                                                   | 33.8 (31.3, 40.0)                                         | 31.4 (28.9, 35.3)                                                                  |
| HbA1c (mmol/m)                                    | 54 (48, 63)                                                         | 56 (51, 64)                                               | 51 (48, 54)                                                                        |
| HbA1c (%)                                         | 7.1 (6.5, 7.9)                                                      | 7.3 (6.8, 8.0)                                            | 6.8 (6.5, 7.1)                                                                     |
| Ambulatory activity (steps/day)                   | 6132 (4588, 7986)                                                   | 7794 (5738, 9038)                                         | 5101 (4005, 7720)                                                                  |
| Moderate to vigorous physical activity (mins/day) | 23.3 (13.9, 35.6)                                                   | 24.4 (16.2, 44.4)                                         | 17.9 (9.7, 31.3)                                                                   |
| Sedentary behaviour (mins/day)                    | 584.0 (852, 945)                                                    | 536.4 (468.9, 584.0)                                      | 576.7 (520.9, 645)                                                                 |
| Accelerometer wear time (mins/day)                | 891.4 (851.7, 944.6)                                                | 869.4 (824.5, 921.3)                                      | 876.9 (845.6, 907.1)                                                               |

Data as median (IQR) or number (%)

**Supplementary Table S3: Study characteristics stratified by inclusion status**

| Characteristic            | Included ( = 148) | Excluded (n = 50) |
|---------------------------|-------------------|-------------------|
| Age (years)               | 52 (47, 62)       | 47 (42, 55)       |
| Sex                       |                   |                   |
| Women (%)                 | 61 (41)           | 25 (50)           |
| Men (%)                   | 87 (59)           | 25 (50)           |
| Ethnicity                 |                   |                   |
| White (%)                 | 101 (68)          | 26 (52)           |
| South Asian (%)           | 36 (24)           | 23 (46)           |
| Other (%)                 | 11 (7)            | 1 (2)             |
| Medications               |                   |                   |
| Metformin (%)             | 133 (90)          | 49 (98)           |
| Sulphonylureas (%)        | 16 (11)           | 13 (26)           |
| Other (%)                 | 6 (4)             | 3 (6)             |
| Diabetes duration (years) | 4.7 (2.6, 7.7)    | 4.0 (2.0, 6.8)    |
| BMI (kg/m <sup>2</sup> )  | 34.0 (31.0, 37.3) | 33.1 (31.6, 39.2) |
| HbA1c (mmol/mol)          | 53 (48, 59)       | 56 (51, 64)       |
| HbA1c (%)                 | 7.0 (6.5, 7.5)    | 7.3 (6.8, 8.0)    |

Supplementary Figure S1: Change from baseline in weight and HbA1c by control, diet, drug and combination interventions. Data as mean (95% CI)

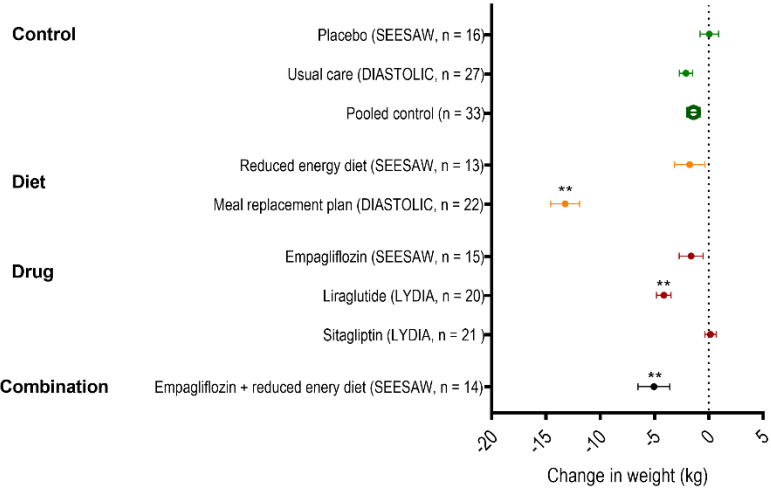

Adjusted for age, sex, ethnicity, diabetes duration, baseline weight.  
\* = P<0.05 vs. control, \*\* = P<0.01 vs. control

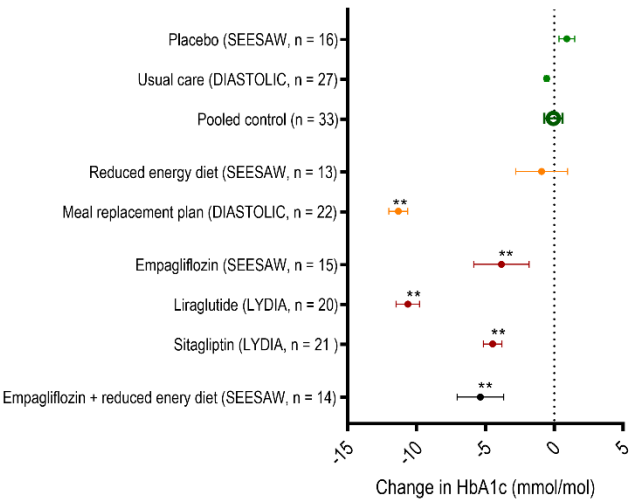

Adjusted for age, sex, ethnicity, diabetes duration, baseline BMI, baseline HbA1c  
\* = P<0.05 vs. control, \*\* = P<0.01 vs. control

Supplementary Figure S2: Distribution of change values for total physical activity in each analysed group

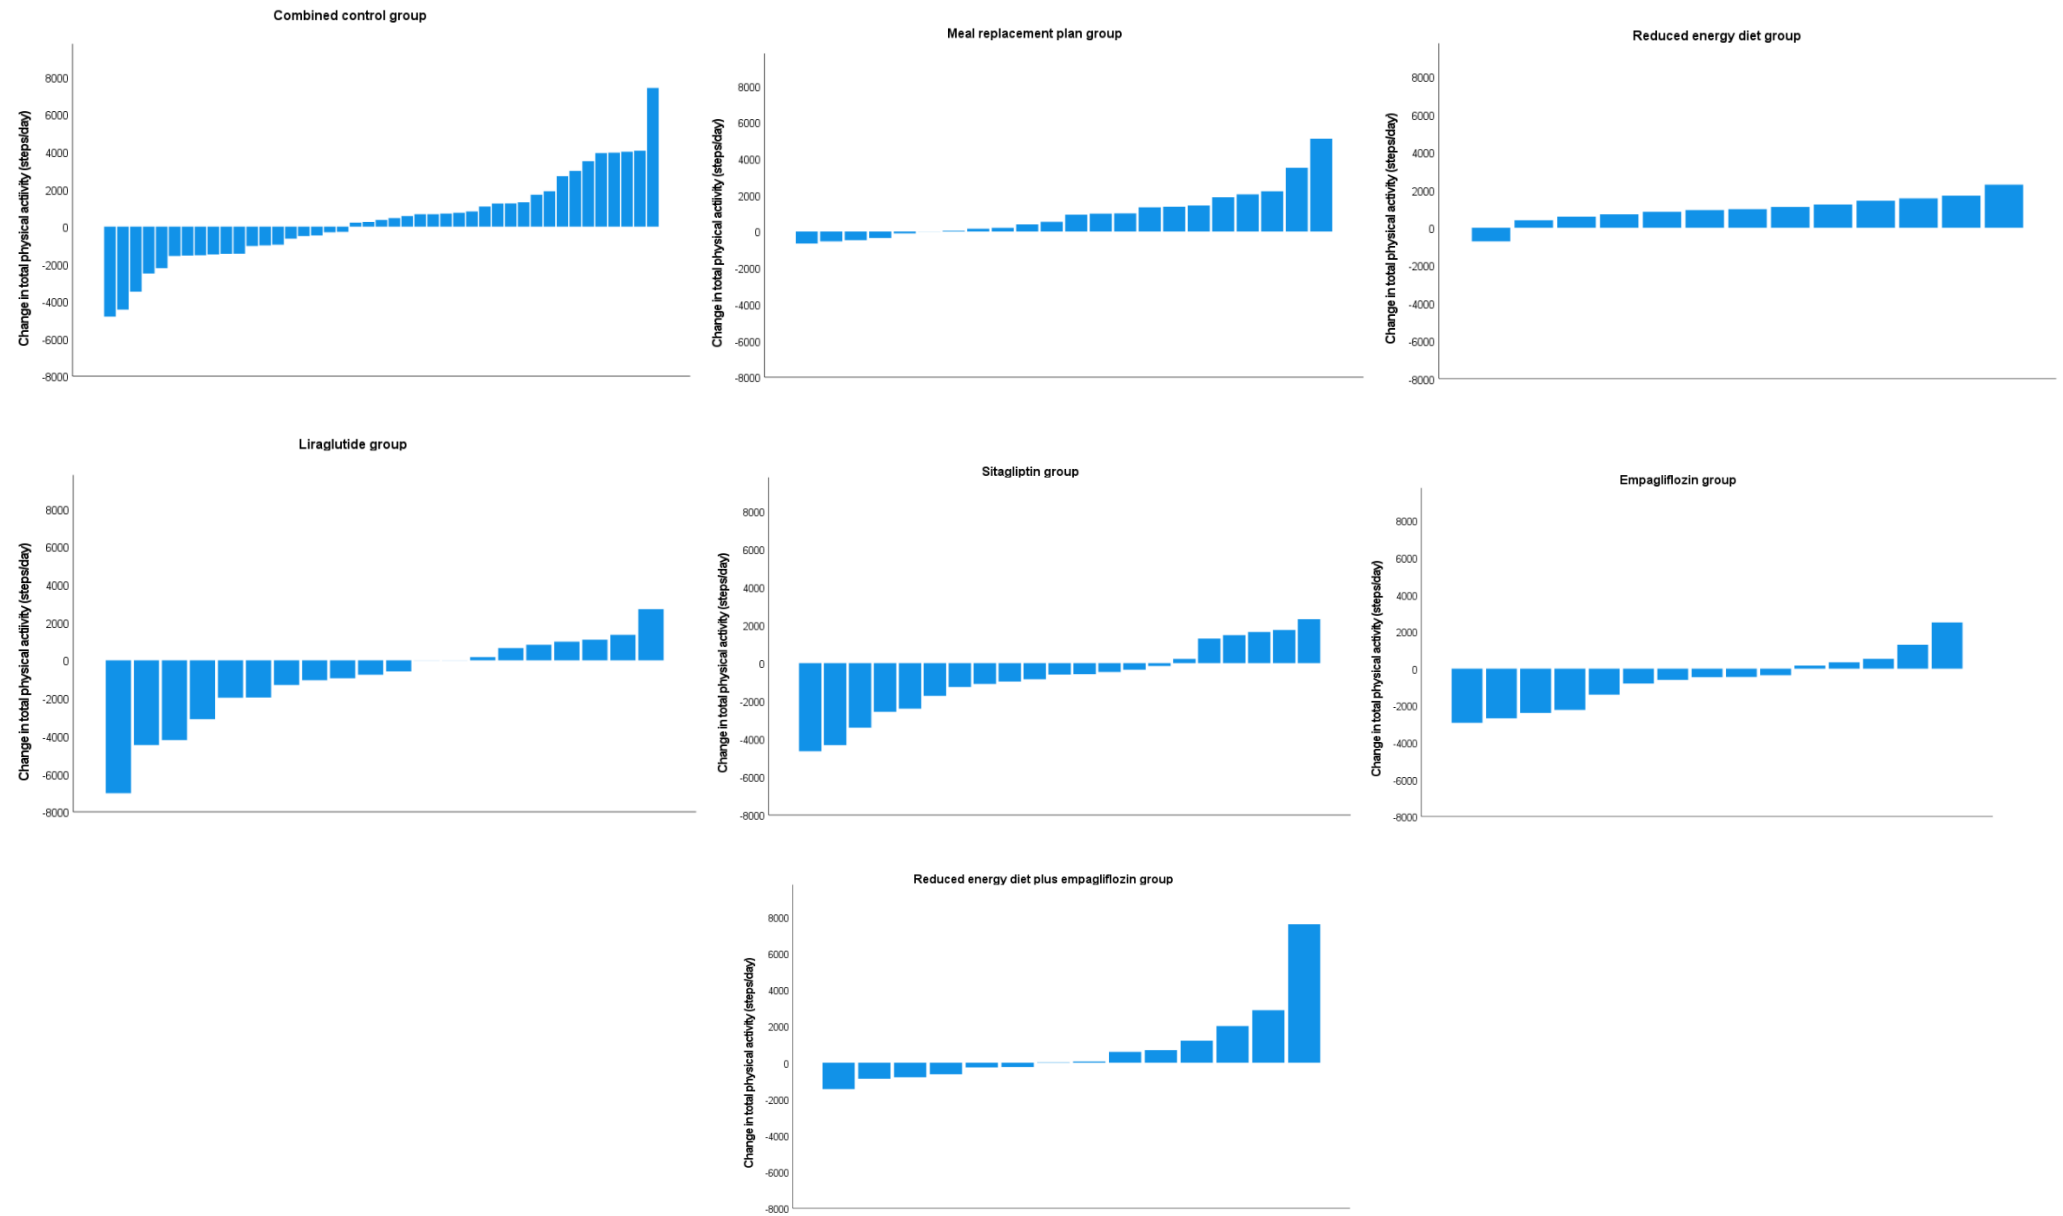

Supplement: Supplementary file 1 [file 36490455]
